# Supplementary material for: Premature white matter microstructure in female children with a history of concussion
Source: bioRxiv or medRxiv preprint supplement (doi:10.1101/2021.12.02.21267220), 2021-12-05
Supplement: Supplementary file [file media-1.pdf]

**Supplementary Table 1 Demographic characteristics of the matched comparison group**

|                                  | Concussion<br>(n = 336) |             | Matched Comparison Group<br>(n = 336) |             | p    |
|----------------------------------|-------------------------|-------------|---------------------------------------|-------------|------|
|                                  | M                       | F           | M                                     | F           |      |
| <b>n</b>                         | 203 (60.4%)             | 133 (39.6%) | 199 (61.3%)                           | 130 (38.7%) | .813 |
| <b>Average Age in Months</b>     | 120 (7.50)              | 121 (7.42)  | 119 (7.38)                            | 120 (7.59)  | .167 |
| <b>Pubertal Status</b>           |                         |             |                                       |             |      |
| Prepubescence <sup>a</sup>       | 150 (73.9%)             | 34 (25.6%)  | 146 (70.9%)                           | 35 (26.9%)  | .816 |
| Pubescence <sup>b</sup>          | 53 (26.1%)              | 99 (74.4%)  | 60 (29.1%)                            | 95 (73.1%)  |      |
| <b>Family Income<sup>c</sup></b> |                         |             |                                       |             |      |
| < 50K                            | 47 (23.2%)              | 30 (22.6%)  | 49 (23.8%)                            | 24 (18.5%)  | .888 |
| 50-99K                           | 65 (32.0%)              | 33 (24.8%)  | 58 (28.2%)                            | 38 (29.2%)  |      |
| > 100K                           | 91 (44.8%)              | 70 (52.6%)  | 99 (48.1%)                            | 68 (52.3%)  |      |
| <b>Race</b>                      |                         |             |                                       |             |      |
| Non-Hispanic White               | 124 (61.1%)             | 97 (72.9)   | 118 (57.3%)                           | 84 (64.6%)  | .203 |
| Non-Hispanic Black               | 17 (8.4%)               | 10 (7.5%)   | 32 (15.5%)                            | 10 (7.7%)   |      |
| Hispanic                         | 35 (17.2%)              | 16 (12.0%)  | 38 (18.4%)                            | 23 (17.7%)  |      |
| Asian <sup>d</sup>               | 4 (2.0%)                | 0 (0.0%)    | 4 (1.9%)                              | 1 (0.8%)    |      |
| Other/Multi-Racial               | 23 (11.3%)              | 10 (7.5%)   | 14 (6.8%)                             | 12 (9.2%)   |      |

P values were calculated using Independent t-test for continuous variables and chi-square test for categorical variables.

<sup>a</sup>Prepubescence includes children at pubertal stages 1 and 2, as defined by the Physical Health Measure completed by Parents.

<sup>b</sup>Pubescence includes children at pubertal stages 3-5, as defined by the Physical Health Measure completed by Parents.

<sup>c</sup>Family Income refers to total combined family income.

<sup>d</sup>Asian race refers to Asian Indian, Chinese, Filipino, Japanese, Korean, Vietnamese, other Asian.

M, males; F, females.

**Supplementary Table 2 Demographic and injury characteristics for participants scanned on Siemens Prisma scanners**

|                                  | Concussion Scanned on Siemens<br>(n = 223) |            | Siemens Comparison Group<br>(n = 4498) |              | p     |
|----------------------------------|--------------------------------------------|------------|----------------------------------------|--------------|-------|
|                                  | M                                          | F          | M                                      | F            |       |
| <b>n</b>                         | 128 (57.4%)                                | 95 (42.6%) | 2381 (52.9%)                           | 2117 (47.1%) | .192  |
| <b>Average Age in Months</b>     | 121 (7.35)                                 | 120 (7.56) | 119 (7.41)                             | 119 (7.32)   | .010  |
| <b>Pubertal Status</b>           |                                            |            |                                        |              |       |
| Prepubescence <sup>a</sup>       | 94 (73.4%)                                 | 23 (24.2%) | 1612 (67.7%)                           | 632 (29.9%)  | .452  |
| Pubescence <sup>b</sup>          | 34 (26.6%)                                 | 72 (75.8%) | 769 (32.3%)                            | 1485 (70.1%) |       |
| <b>Family Income<sup>c</sup></b> |                                            |            |                                        |              |       |
| < 50K                            | 32 (25.0%)                                 | 21 (22.1%) | 715 (30.0%)                            | 630 (29.8%)  | .118  |
| 50-99K                           | 43 (33.6%)                                 | 24 (25.3%) | 648 (27.2%)                            | 672 (31.7%)  |       |
| > 100K                           | 53 (41.4%)                                 | 50 (52.6%) | 1018 (42.8%)                           | 815 (38.5%)  |       |
| <b>Race</b>                      |                                            |            |                                        |              |       |
| Non-Hispanic White               | 82 (64.1%)                                 | 74 (77.9%) | 1336 (56.1%)                           | 1154 (54.5%) | <.001 |
| Non-Hispanic Black               | 14 (10.9%)                                 | 8 (8.4%)   | 368 (15.5%)                            | 321 (15.2%)  |       |
| Hispanic                         | 20 (15.6%)                                 | 9 (9.5%)   | 431 (18.1%)                            | 417 (19.7%)  |       |
| Asian <sup>d</sup>               | 3 (2.3%)                                   | 0 (0%)     | 34 (1.4%)                              | 36 (1.7%)    |       |
| Other/Multi-Racial               | 9 (7.0%)                                   | 4 (4.2%)   | 212 (8.9%)                             | 189 (8.9%)   |       |

P values were calculated using Independent t-test for continuous variables and chi-square test for categorical variables.

<sup>a</sup>Prepubescence includes children at pubertal stages 1 and 2, and pubescence includes children at pubertal stages 3-5, as defined by the Physical Health Measure completed by Parents.

<sup>c</sup>Family Income refers to total combined family income.

<sup>d</sup>Asian race refers to Asian Indian, Chinese, Filipino, Japanese, Korean, Vietnamese, other Asian.

M, males; F, females.

**Supplementary Table 3 Group comparisons of mean neurite density between children with concussion and matched comparison group and Siemens Prisma group**

|                           |            | Interaction   |             |               |             | Main Effect  |             |               |                 | R <sup>2</sup> |
|---------------------------|------------|---------------|-------------|---------------|-------------|--------------|-------------|---------------|-----------------|----------------|
|                           |            | Group by Sex  |             | Age by Sex    |             | Female Sex   |             | Age           |                 |                |
|                           |            | $\beta$       | <i>p</i>    | $\beta$       | <i>p</i>    | $\beta$      | <i>p</i>    | $\beta$       | <i>p</i>        |                |
| <b>Matched Comparison</b> | <b>SWM</b> | <b>-0.009</b> | <b>.039</b> | -             | -           | <b>0.007</b> | <b>.041</b> | <b>0.0007</b> | <b>&lt;.001</b> | 0.498          |
|                           | <b>DWM</b> | <i>-0.007</i> | <i>.070</i> | -             | -           | 0.005        | .121        | <b>0.0007</b> | <b>&lt;.001</b> | 0.470          |
| <b>Siemens Prisma</b>     | <b>SWM</b> | <b>-0.010</b> | <b>.007</b> | -             | -           | <b>0.007</b> | <b>.008</b> | <b>0.0005</b> | <b>&lt;.001</b> | 0.182          |
|                           | <b>DWM</b> | <b>-0.006</b> | <b>.046</b> | <b>0.0002</b> | <b>.040</b> | 0.003        | .133        | <b>0.0004</b> | <b>&lt;.001</b> | 0.089          |

*P* < .05 is bolded, *p* < .1 is italicized with comparison group as the reference group.

Main effects of sex and age are reported for all models.

R<sup>2</sup> represents conditional R<sup>2</sup> which takes both the fixed and random effects into account.

SWM, superficial white matter; DWM, deep white matter.

**Supplementary Table 4 Association between neurite density in the concussion group and injury variables**

|                                      | Superficial White Matter |      |              |             |              |             | Deep White Matter |             |          |      |               |             |
|--------------------------------------|--------------------------|------|--------------|-------------|--------------|-------------|-------------------|-------------|----------|------|---------------|-------------|
|                                      | All                      |      | Female       |             | Male         |             | All               |             | Female   |      | Male          |             |
|                                      | $\beta$                  | $p$  | $\beta$      | $p$         | $\beta$      | $p$         | $\beta$           | $p$         | $\beta$  | $p$  | $\beta$       | $p$         |
| <b>Injury Mechanism</b>              |                          |      |              |             |              |             |                   |             |          |      |               |             |
| Fight                                | 0.005                    | .637 | 0.004        | .760        | 0.016        | .302        | 0.006             | .637        | 0.012    | .338 | 0.009         | .577        |
| MVA                                  | -0.0005                  | .945 | -0.013       | .299        | 0.008        | .479        | <b>-0.018</b>     | <b>.039</b> | -0.015   | .172 | <i>-0.019</i> | <i>.097</i> |
| Play/Sports                          | 0.003                    | .890 | -0.004       | .449        | <b>0.010</b> | <b>.049</b> | 0.0001            | .979        | -0.004   | .396 | 0.003         | .596        |
| Other                                | -0.002                   | .806 | -0.005       | .726        | 0.003        | .832        | 0.004             | .806        | -0.003   | .809 | 0.008         | .603        |
| <b>Number of Injuries</b>            | 0.0002                   | .969 | 0.003        | .647        | -0.011       | .235        | -0.002            | .969        | -0.002   | .773 | -0.008        | .364        |
| w/ Loss of Consciousness <30 minutes | 0.004                    | .580 | <i>0.010</i> | <i>.066</i> | 0.002        | .710        | -0.002            | .667        | 0.008    | .109 | -0.007        | .276        |
| w/ Post-Traumatic Amnesia <24 hours  | 0.006                    | .477 | -0.001       | .904        | <i>0.013</i> | <i>.064</i> | 0.003             | .505        | -0.0004  | .953 | 0.006         | .437        |
| <b>Age at First Injury</b>           | -0.00002                 | .912 | -0.0001      | .668        | 0.0002       | .544        | -0.00003          | .912        | -0.00002 | .939 | 0.0001        | .687        |
| <b>Time Since First Injury</b>       | -0.00001                 | .946 | -0.0002      | .366        | 0.0003       | .402        | 0.00002           | .946        | -0.0001  | .612 | 0.0002        | .459        |

$P < .05$  is bolded,  $p < .1$  is italicized.

Effects are reported for concussion group analyses and sex stratified analyses.

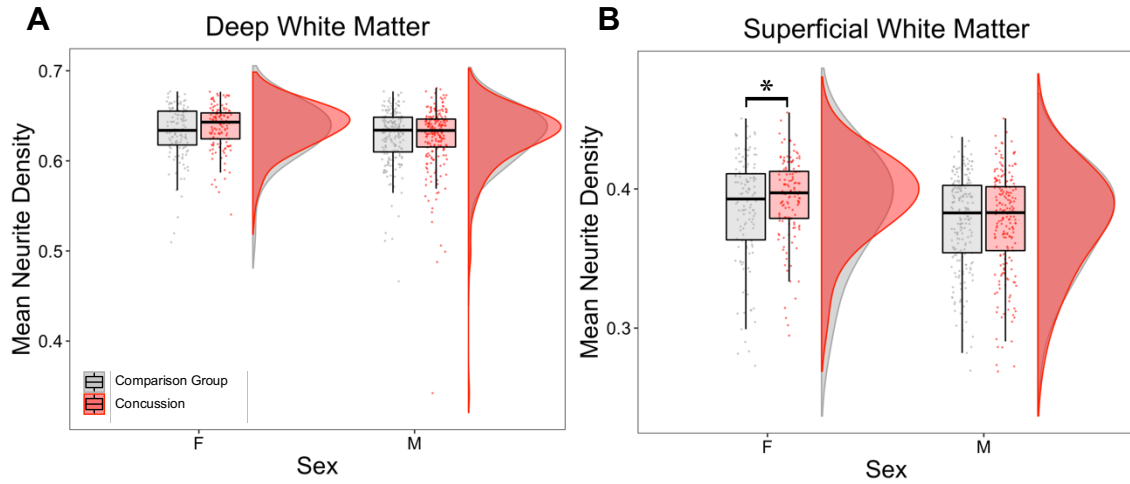

**Supplementary Figure 1 Mean ND in children with concussion compared to matched comparison group. (A) Deep white matter. (B) Superficial white matter.**

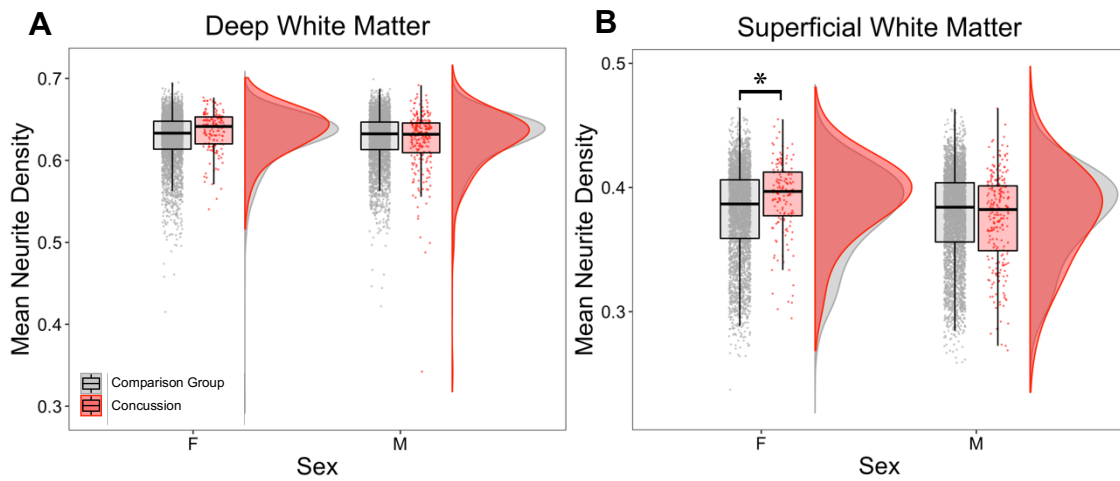

**Supplementary Figure 2 Mean ND from Siemens scanners in children with concussion compared to comparison group. (A) Deep white matter. (B) Superficial white matter.**
